# Supplementary material for: TiO2 supported Ru catalysts for the hydrogenation of succinic acid: influence of the support
Source: Royal Society of Chemistry journal article supplement (doi:10.1039/d0cy01446j), 2020-01-01
Supplement: d0cy01446j1.pdf [file d0cy01446j1.pdf]

**Electronic Supplementary Information to :**

**TiO<sub>2</sub> supported Ru catalysts for the hydrogenation of succinic acid:  
influence of the support**

**Magdalena Brzezinska<sup>a</sup>, Johannes Niemeier<sup>b</sup>, Yannik Louven<sup>b</sup>, Nicolas Keller<sup>c</sup>, Regina Palkovits<sup>b</sup>, Agnieszka M. Ruppert<sup>a</sup>**

a. Institute of General and Ecological Chemistry, Faculty of Chemistry, Łódź University of Technology, ul. Żeromskiego 116, 90-924 Łódź, Poland.

e-mail: [agnieszka.ruppert@p.lodz.pl](mailto:agnieszka.ruppert@p.lodz.pl); Fax: +48426313128; Tel: +48426313106

b. Institut für Technische und Makromolekulare Chemie, RWTH Aachen University, Worringerweg 2, 52074 Aachen, Germany

c. Institut de Chimie et Procédés pour l’Energie, l’Environnement et la Santé, ICPEES, CNRS, University of Strasbourg, 25 rue Becquerel, 67087 Strasbourg, France

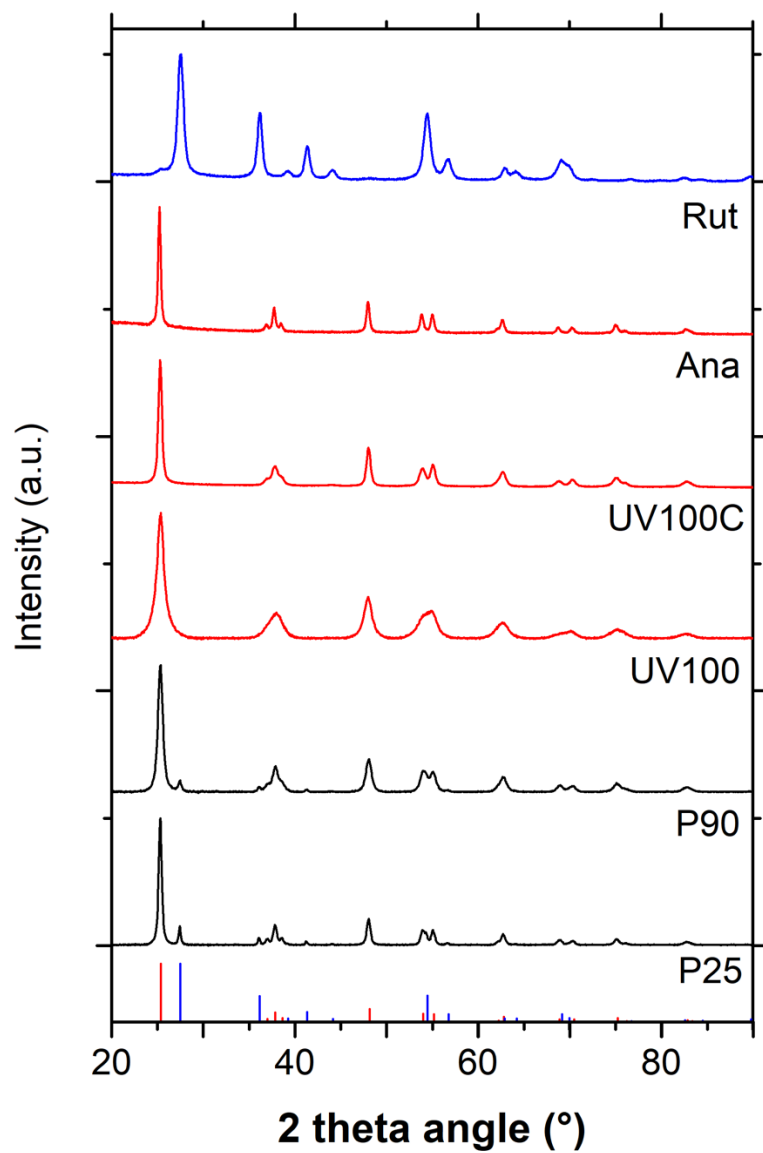

**Figure S1.** X-ray diffraction patterns of the TiO<sub>2</sub> supports. Reflexes were assigned to both anatase TiO<sub>2</sub> and rutile TiO<sub>2</sub> phases using 21-1272 and 21-1276 JCPDS cards, respectively.

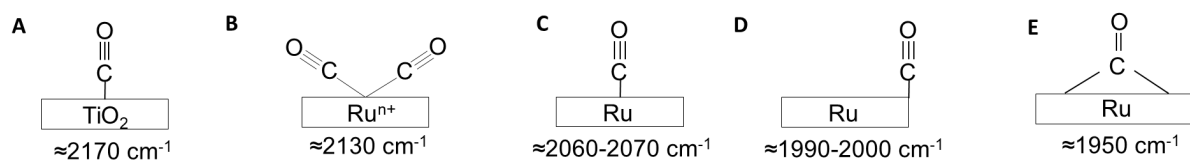

**Figure S2.** Simplified illustration of the different bonded CO species used for the band assignment in the FTIR spectra of adsorbed CO recorded for the Ru/TiO<sub>2</sub> catalysts. (A) CO adsorbed on the TiO<sub>2</sub> support surface, (B) multicarbonyl species on partially oxidized Ru crystallite, (C) , linear-bonded CO on facets, (D) linear bonded CO on steps and (E) bridge-bonded CO.

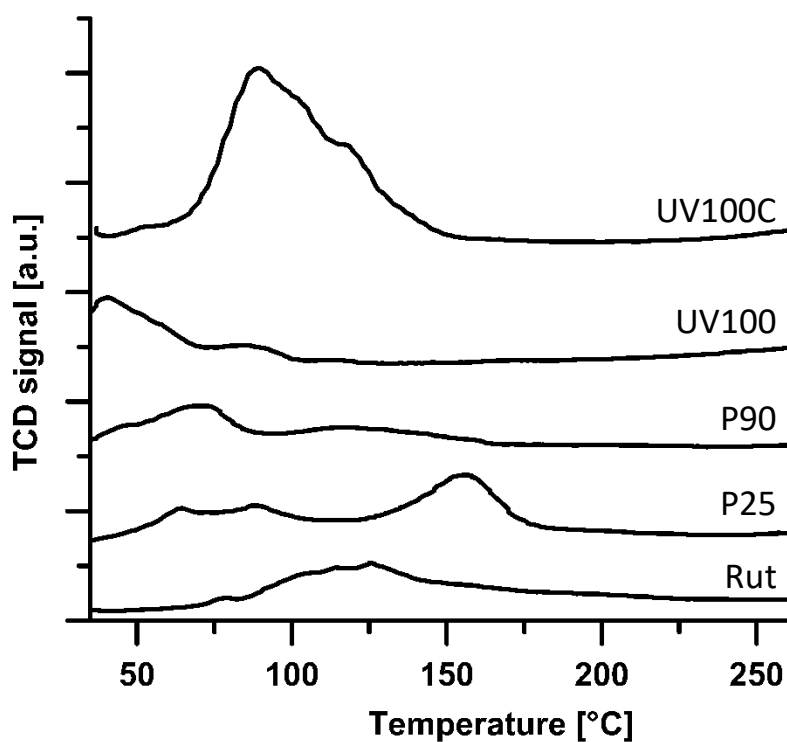

**Figure S3.** Temperature programmed reduction (TPR) profiles for the 1%Ru/TiO<sub>2</sub> catalysts after the oxidation step, for the catalysts prepared *via* the wet impregnation method.

No TPR signal can be obtained for the catalysts prepared at room temperature by direct chemical reduction with NaBH<sub>4</sub> or through the solar photon-assisted synthesis method.
